# Supplementary material
Source: PubMed Central journal article supplement (PMC10231184)
Supplement: aem.00014-23-s0001.pdf [file aem.00014-23-s0001.pdf]

## Supplemental material

**Supplemental table S1** *Sampling points for the detection of C. difficile in the hospital environment with approximate surface areas or volumes*

| <b>Patient room</b>         |                                                           | <b>Soiled workroom</b>               |                                                          |
|-----------------------------|-----------------------------------------------------------|--------------------------------------|----------------------------------------------------------|
| Sampling points             | Surface area [cm <sup>2</sup> ] or retrieved volume [mL]  | Sampling points                      | Surface area [cm <sup>2</sup> ] or retrieved volume [mL] |
| <b>Patient room/area</b>    |                                                           | <b>Washer-disinfector</b>            |                                                          |
| Swab disinfectant dispenser | Lever and disinfectant bottle outer surface (40x90x16 cm) | Swab operating buttons               | Different designs                                        |
| Swab door handle            | Whole inner handle (50 cm <sup>2</sup> )                  | Trap biofilm                         | *                                                        |
| Swab light switch           | Different designs                                         | Trap stagnant water                  | 100 mL                                                   |
|                             |                                                           | Swab reusable stainless steel bedpan | Inner surface and seating (37x29x10 cm)                  |
| <b>Patient bathroom</b>     |                                                           | <b>Sink</b>                          |                                                          |
| Swab sink                   | Different designs (bowl and faucet)                       | Swab sink                            | 270 cm <sup>2</sup> (bowl and faucet)                    |
| Sink trap biofilm           | *                                                         | Sink trap biofilm                    | *                                                        |
| Sink trap stagnant water    | 100 mL                                                    | Sink trap stagnant water             | 100 mL                                                   |
| Swab toilet flush button    | 50 cm <sup>2</sup>                                        |                                      |                                                          |
| Swab toilet seat            | 31.5x42 cm                                                |                                      |                                                          |
| Swab toilet bowl            | Different designs. Bowl inner surface                     |                                      |                                                          |

---

|                            |        |
|----------------------------|--------|
| Shower trap biofilm        | *      |
| Shower trap stagnant water | 100 mL |

---

\*biofilms varied in weight and optics
